# Supplementary material for: CENP-A is essential for cardiac progenitor cell proliferation
Source: PubMed Central journal article supplement — Cell Cycle. 2013 Dec 20;13(5):739–48. doi: 10.4161/cc.27549 (PMC3979910; doi:10.4161/cc.27549), 2013-12-20
Supplement: cc-13-739-s01.pdf [file cc-13-739-s01.pdf]

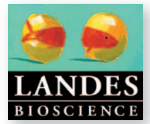

## **Supplemental Material to:**

**Michael McGregor, Nirmala Hariharan, Anya Y Joyo,  
Robert L Margolis, and Mark A Sussman**

**CENP-A is essential for cardiac progenitor cell proliferation**

**Cell Cycle 2014; 13(5)**

**<http://dx.doi.org/10.4161/cc.27549>**

**<http://www.landesbioscience.com/journals/cc/article/27549>**

## Supplemental Figure 1

### A

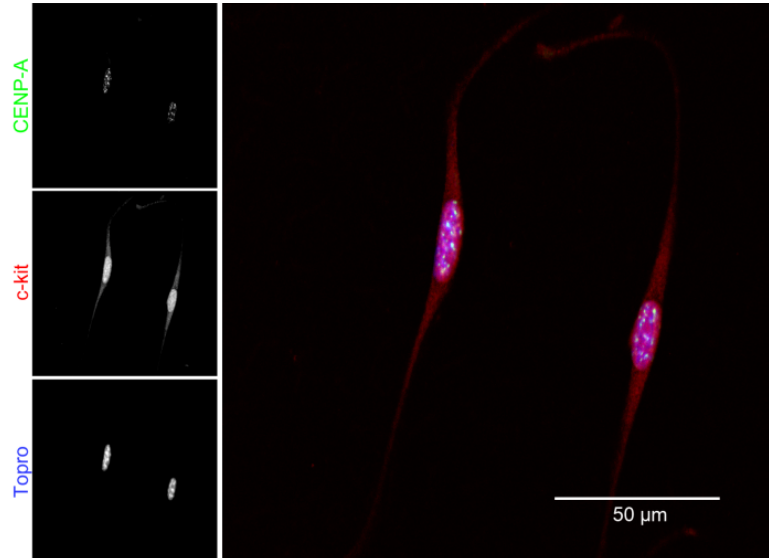

### B

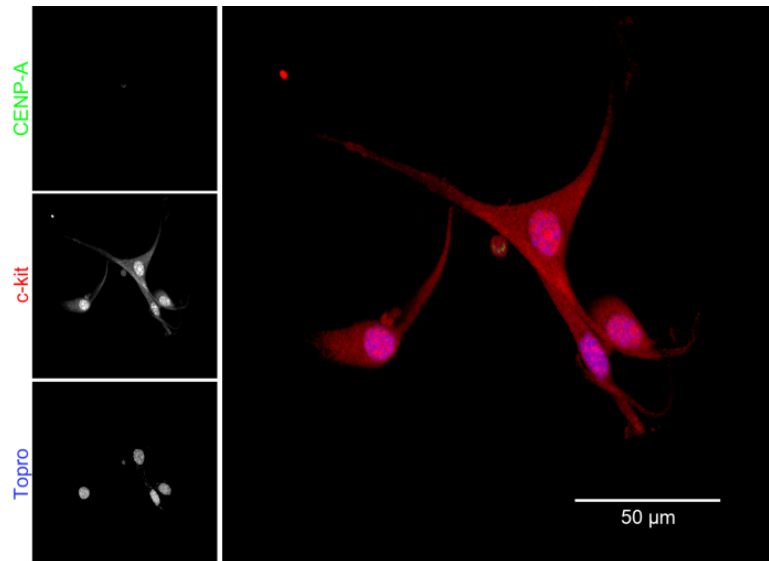

**Supplemental Figure 1: CENP-A shRNA effectively silences CENP-A expression in cultured CPCs.** (A) Representative immunohistochemical analysis of ScrCon CPCs. (B) Representative image of CENP-A KD CPCs. CENP-A is represented in green, c-kit is shown in red, and the nuclear stain topro is shown in blue.

Supplemental Figure 2

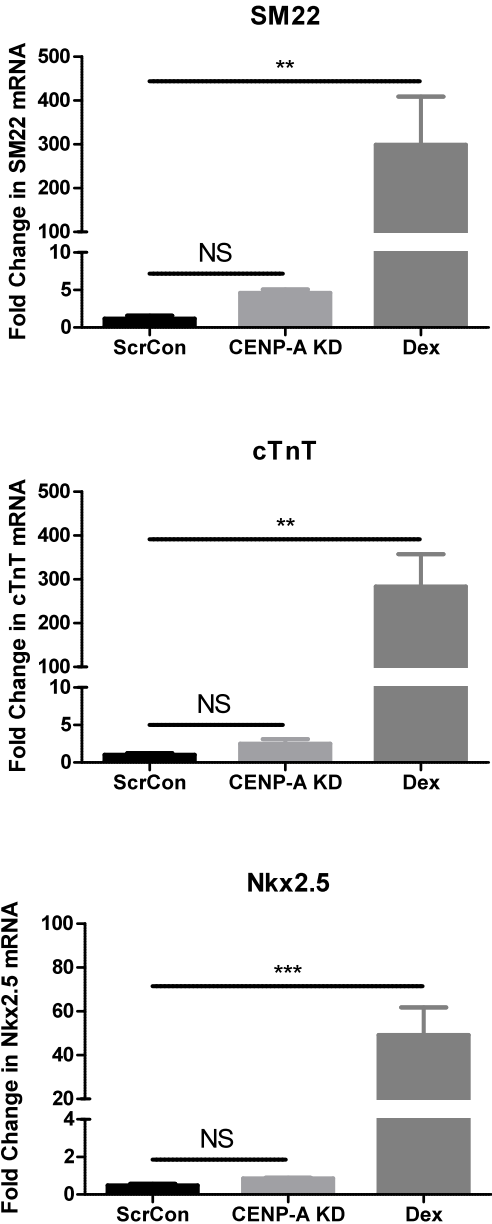

**Supplemental Figure 2: CENP-A silencing does not result in CPC differentiation.** qPCR analysis of cellular commitment markers SM22, cTnT, and Nkx2.5 , revealing no significant increase in transcription in CENP-A KD CPCs.
